# Supplementary material
Source: PubMed Central journal article supplement (PMC4855605)
Supplement: pnas.1524538113.sapp.pdf [file pnas.1524538113.sapp.pdf]

## **SUPPLEMENTAL INFORMATION FOR:**

### **Cofactor bypass variants reveal a conformational control mechanism governing cell wall polymerase activity**

Monica Markovski<sup>1</sup>, Jessica L. Bohrhunter<sup>1</sup>, Tania J. Lupoli<sup>3,4</sup>, Tsuyoshi Uehara<sup>1,5</sup>, Suzanne Walker<sup>1,3</sup>, Daniel E. Kahne<sup>2,3</sup>, and Thomas G. Bernhardt<sup>1\*</sup>

<sup>1</sup>Department of Microbiology and Immunobiology

<sup>2</sup>Department of Biological Chemistry and Molecular Pharmacology

Harvard Medical School, Boston, MA 02115 USA

<sup>3</sup>Department of Chemistry and Chemical Biology, Harvard University, Cambridge, MA 02138 USA

<sup>4</sup>Current address: Cornell Medical School, New York, NY

<sup>5</sup>Current address: Novartis Institutes for Biomedical Research, Emeryville, CA

\*To whom correspondence should be addressed.

Thomas G. Bernhardt, Ph.D.

Harvard Medical School

Department of Microbiology and Immunobiology

HIM Building, Room 1026

4 Blackfan Circle

Boston, Massachusetts 02115

Phone: (617) 432-6971

Fax: (617) 738-7664

e-mail: [thomas\\_bernhardt@hms.harvard.edu](mailto:thomas_bernhardt@hms.harvard.edu)

**Classification:** BIOLOGICAL SCIENCES; MICROBIOLOGY

**Keywords:** penicillin, antibiotics, cell wall, peptidoglycan, PBP

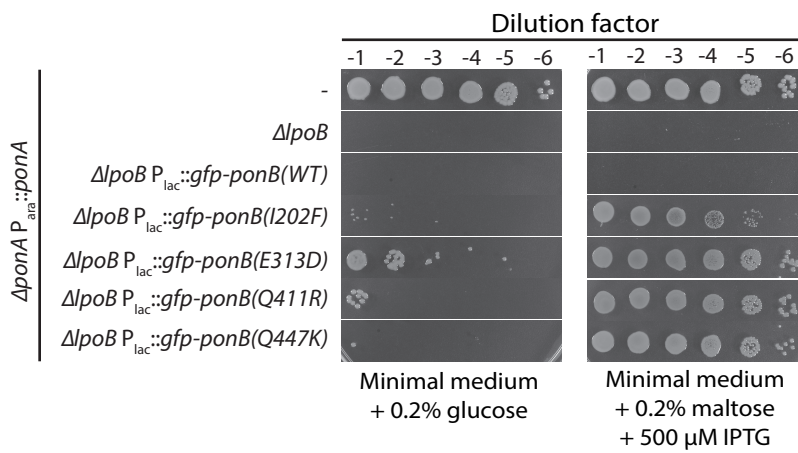

Figure S1

Figure S1. Suppression of the PBP1a- LpoB- synthetic lethal phenotype by ectopically produced GFP-PBP1b\* fusions. Cells of TU121(att $\lambda$ TB309) [ $\Delta$ ponA (Para::ponA)], MM33(att $\lambda$ TB309) [ $\Delta$ ponA  $\Delta$ lpoB (Para::ponA)], and MM33(att $\lambda$ TB309) derivatives harboring the indicated chromosomally integrated expression constructs: (attHKMM6) [Plac::gfp-ponB(WT)], (attHKMM79) [Plac::gfp-ponB(Q411R)], (attHKMM80) [Plac::gfp-ponB(I202F)], (attHKMM81) [Plac::gfp-ponB(E313D)], (attHKMM89) [Plac::gfp-ponB(Q447K)], grown and plated on the indicated media as described in Figure 2.

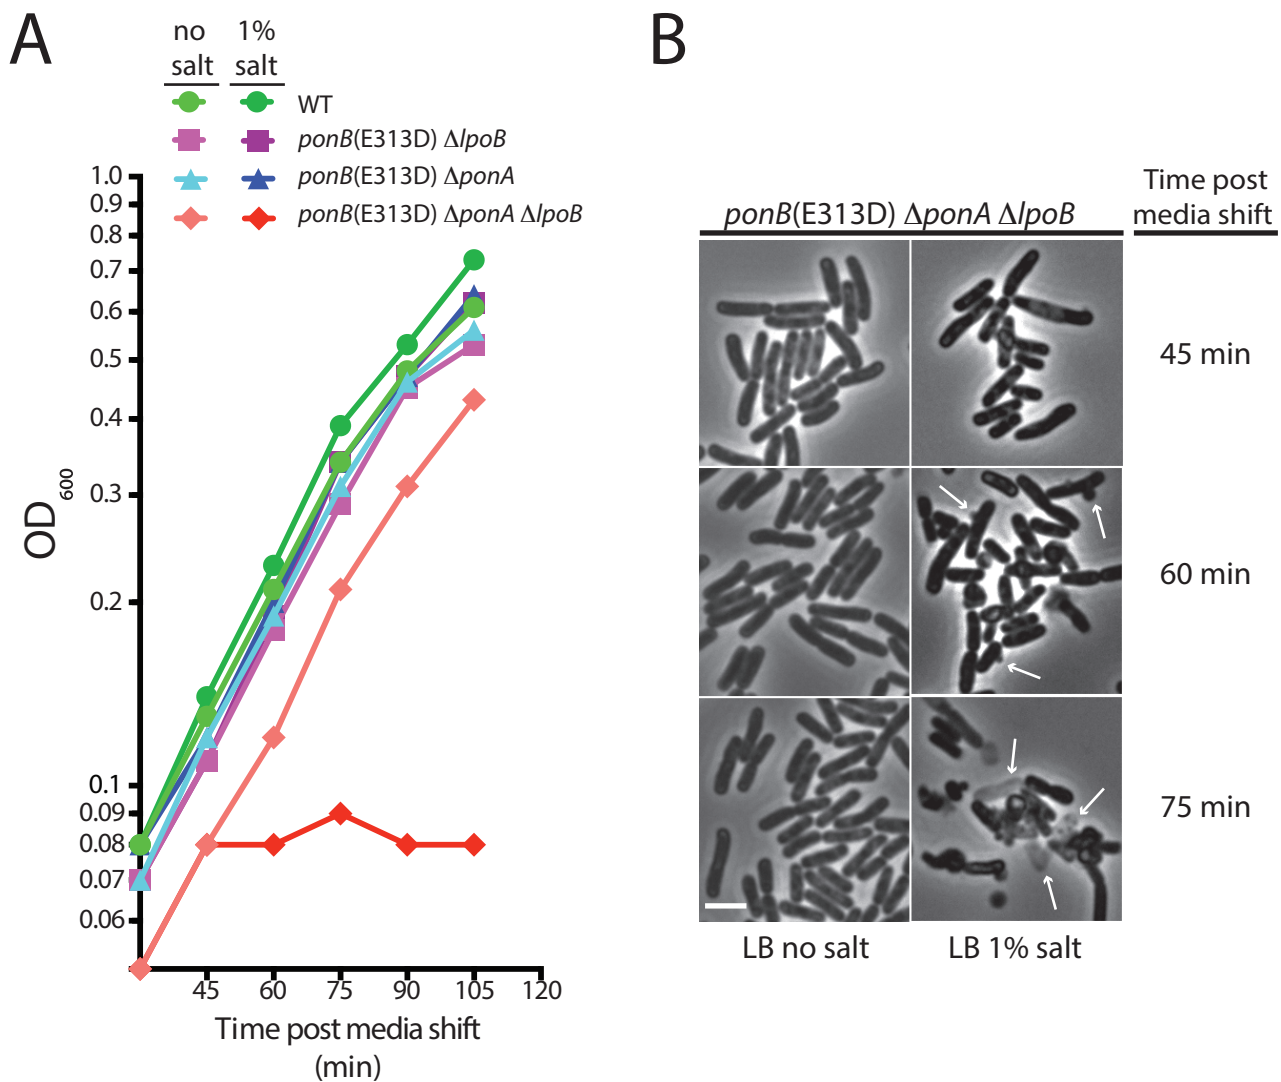

Figure S2

Figure S2. Conditional growth of cells producing PBP1b(E313D) in the absence of PBP1a and LpoB. (A) Cells of MG1655 [WT], MM49 [*ponB(E313D) ΔlpoB*], MM120 [*ponB(E313D) ΔponA*], and MM119 [*ponB(E313D) ΔponA ΔlpoB*] were grown overnight in LB without added salt (LB0N) at 30°C. The resulting cultures were diluted 1:100 in the same medium, grown to midlog at 37°C, and diluted to an OD<sub>600</sub> of 0.025 in either LB0N or LB with 1% NaCl as indicated. Growth at 37°C was followed by regular OD<sub>600</sub> measurements. Growth of strains harboring a single mutation (*ponB(E313D)* or  $\Delta$ *ponA* or  $\Delta$ *lpoB*) was similar to WT in both conditions, but the growth curves were omitted from the panel so that the salt-dependant phenotype of MM119 could be more easily observed. (B) Cells of MM119 [*ponB(E313D) ΔponA ΔlpoB*] were grown similarly to those in (A). Cells were removed at the indicated time points, fixed, and visualized using phase-contrast optics. Bar equals 4 microns. Arrows point to membrane blebs and lysed cell ghosts observed in MM119 [*ponB(E313D) ΔponA ΔlpoB*] cells grown in LB with 1% NaCl.

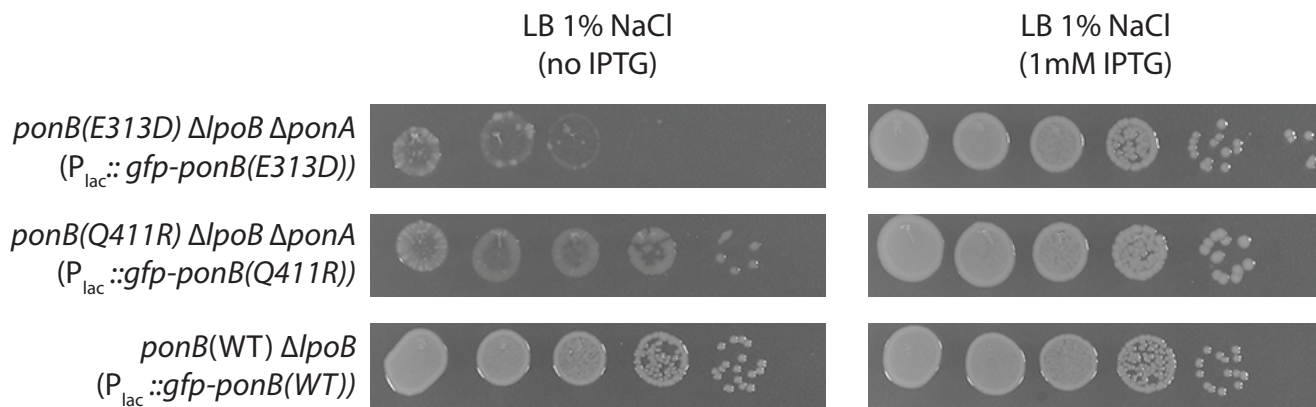

Figure S3

Figure S3. Overproduction of PBP1b\* variants allows the simultaneous deletion of *ponA* and *lpoB*. Cells of JLB56(attHKMM81) [*ponB(E313D) ΔponA ΔlpoB* (P<sub>lac</sub>:: *gfp-ponB(E313D)*), JLB57(attHKMM79) [*ponB(Q411R) ΔponA ΔlpoB* (P<sub>lac</sub>:: *gfp-ponB(Q411R)*), and MM40 (attHKMM6) [*ΔlpoB* (P<sub>lac</sub>:: *gfp-ponB(WT)*)] were grown overnight in LB 0.5% NaCl supplemented with 1 mM IPTG at 30°C. The resulting cultures were washed once in LB 0% NaCl, serially diluted and plated on LB 1% NaCl with or without supplementation with 1 mM IPTG as indicated and grown at 30°C overnight before being photographed.



## SUPPLEMENTAL FIGURE LEGENDS

**Figure S1. Suppression of the PBP1a<sup>-</sup> LpoB<sup>-</sup> synthetic lethal phenotype by ectopically produced GFP-PBP1b\* fusions.** Cells of TU121(*attλ*TB309) [ $\Delta$ *ponA* (*P*<sub>ara</sub>::*ponA*)], MM33(*attλ*TB309) [ $\Delta$ *ponA*  $\Delta$ *lpoB* (*P*<sub>ara</sub>::*ponA*)], and MM33(*attλ*TB309) derivatives harboring the indicated chromosomally integrated expression constructs: (*att*HKMM6) [*P*<sub>lac</sub>::*gfp-ponB*(WT)], (*att*HKMM79) [*P*<sub>lac</sub>::*gfp-ponB*(Q411R)], (*att*HKMM80) [*P*<sub>lac</sub>::*gfp-ponB*(I202F)], (*att*HKMM81) [*P*<sub>lac</sub>::*gfp-ponB*(E313D)], (*att*HKMM89) [*P*<sub>lac</sub>::*gfp-ponB*(Q447K)], grown and plated on the indicated media as described in Figure 2.

**Figure S2. Conditional growth of cells producing PBP1b(E313D) in the absence of PBP1a and LpoB.** (A) Cells of MG1655 [WT], MM49 [*ponB*(E313D)  $\Delta$ *lpoB*], MM120 [*ponB*(E313D)  $\Delta$ *ponA*], and MM119 [*ponB*(E313D)  $\Delta$ *ponA*  $\Delta$ *lpoB*] were grown overnight in LB without added salt (LB0N) at 30°C. The resulting cultures were diluted 1:100 in the same medium, grown to midlog at 37°C, and diluted to an OD<sub>600</sub> of 0.025 in either LB0N or LB with 1% NaCl as indicated. Growth at 37°C was followed by regular OD<sub>600</sub> measurements. Growth of strains harboring a single mutation (*ponB*(E313D) or  $\Delta$ *ponA* or  $\Delta$ *lpoB*) was similar to WT in both conditions, but the growth curves were omitted from the panel so that the salt-dependant phenotype of MM119 could be more easily observed. (B) Cells of MM119 [*ponB*(E313D)  $\Delta$ *ponA*  $\Delta$ *lpoB*] were grown similarly to those in (A). Cells were removed at the indicated time points, fixed, and visualized using phase-contrast optics. Bar equals 4 microns. Arrows point to membrane blebs and lysed cell ghosts observed in MM119 [*ponB*(E313D)  $\Delta$ *ponA*  $\Delta$ *lpoB*] cells grown in LB with 1% NaCl.

**Figure S3. Overproduction of PBP1b\* variants allows the simultaneous deletion of *ponA* and *lpoB*.** Cells of JLB56(*att*HKMM81) [*ponB*(E313D)  $\Delta$ *ponA*  $\Delta$ *lpoB* (*P*<sub>lac</sub>:: *gfp-ponB*(E313D))], JLB57(*att*HKMM79) [*ponB*(Q411R)  $\Delta$ *ponA*  $\Delta$ *lpoB* (*P*<sub>lac</sub>:: *gfp-ponB*(Q411R))], and MM40 (*att*HKMM6) [ $\Delta$ *lpoB* (*P*<sub>lac</sub>:: *gfp-ponB*(WT))] were grown overnight in LB 0.5% NaCl supplemented with 1 mM IPTG at 30°C. The resulting cultures were washed once in LB 0% NaCl, serially diluted and plated on LB 1% NaCl with or without supplementation with 1 mM IPTG as indicated and grown at 30°C overnight before being photographed.

**Table S1. List of *ponB* mutations identified in the LpoB bypass selection.**

| <i>ponB</i> <sup>*</sup> isolate <sup>a</sup> | Amino acid substitution <sup>b</sup> | Base change      |
|-----------------------------------------------|--------------------------------------|------------------|
| LIN39                                         | Q411R                                | CAG → <u>CGG</u> |
| LIN65 <sup>c</sup>                            | I202F                                | ATC → <u>ITC</u> |
| LIN222                                        | E313D                                | GAG → <u>GAT</u> |
| LIN414 <sup>c</sup>                           | I202F                                | CAG → <u>AAG</u> |
| LIN425 <sup>c</sup>                           | Q447K                                | CAG → <u>AAG</u> |
| LIN426 <sup>c</sup>                           | Q447K                                | CAG → <u>AAG</u> |
| LIN440                                        | Q411K                                | CAG → <u>AAG</u> |
| LIN496 <sup>c</sup>                           | I202F                                | ATC → <u>ITC</u> |
| LIN498 <sup>c</sup>                           | Q447K                                | CAG → <u>AAG</u> |
| LIN519                                        | E313D                                | GAG → <u>GAT</u> |
| LIN528 <sup>c</sup>                           | Q447K                                | CAG → <u>AAG</u> |
| LIN536 <sup>c</sup>                           | Q447K                                | CAG → <u>AAG</u> |
| LIN567 <sup>c</sup>                           | Q447K                                | CAG → <u>AAG</u> |
| LIN583 <sup>c</sup>                           | Q447K                                | CAG → <u>AAG</u> |
| LIN698 <sup>c</sup>                           | Q447K                                | CAG → <u>AAG</u> |
| LIN699 <sup>c</sup>                           | Q447K                                | CAG → <u>AAG</u> |

<sup>a</sup>Isolates LIN39-222 were identified in the initial selection/screen. Isolates LIN414-699 were identified in a separate independent selection/screen.

<sup>b</sup>Position relative to first codon of full-length *ponB* gene ATG codon.

<sup>c</sup>LpoB-bypass phenotype is temperature sensitive.

**Table S2. Strains used in this study.**

| Strain                    | Genotype <sup>a</sup>                                                                                    | Source/Reference <sup>b</sup>      |
|---------------------------|----------------------------------------------------------------------------------------------------------|------------------------------------|
| DH5α                      | <i>F</i> – <i>hsdR17 deoR recA1 endA1 phoA supE44 thi-1 gyrA96 relA1 Δ(lacZYA-argF)U169 φ80dlacZΔM15</i> | Gibco BRL                          |
| DH5α( <i>λpir</i> )       | DH5α harboring a <i>λ</i> lysogen producing <i>pir</i> for the replication of R6K vectors                | de Boer lab stock                  |
| Rosetta( <i>λ</i> DE3)    | <i>ompT rB- mB- gal dcm (P<sub>lac</sub>UV5::T7gene1)</i>                                                | Novagen                            |
| MG1655                    | <i>rph-1 ilvG rfb-50</i>                                                                                 | (1)                                |
| JW5157                    | BW25113 <i>ΔlpoB(ycfM)::Kan<sup>R</sup></i>                                                              | (2)                                |
| JW3359                    | BW25113 <i>ΔponA(mrcA)::Kan<sup>R</sup></i>                                                              | (2)                                |
| CAG12025                  | MG1655 <i>yadC::Tn10</i>                                                                                 | (3)                                |
| TB28                      | MG1655 <i>ΔlacZYA::frt</i>                                                                               | (4)                                |
| CB2                       | MG1655 <i>ΔponB (mrcB)::Kan<sup>R</sup></i>                                                              | (5)                                |
| CB4( <i>attλ</i> TB309)   | TB28 <i>ΔponA (mrcA)::frt ΔlpoB::Kan<sup>R</sup> (P<sub>ara</sub>::ponA)</i>                             | (5)                                |
| CB7                       | MG1655 <i>ΔlpoB::Kan<sup>R</sup></i>                                                                     | (5)                                |
| TU121( <i>attλ</i> TB309) | TB28 <i>ΔponA (mrcA)::frt (P<sub>ara</sub>::ponA)</i>                                                    | (5)                                |
| MG5                       | TB28 <i>Δpal::Kan<sup>R</sup></i>                                                                        | (6)                                |
| TU182                     | MG1655 <i>ΔponA (mrcA)::Kan<sup>R</sup></i>                                                              | P1(JW3359) x MG1655                |
| MM33( <i>attλ</i> TB309)  | TB28 <i>ΔponA (mrcA)::frt ΔlpoB::frt (P<sub>ara</sub>::ponA)</i>                                         | CB4( <i>attλ</i> TB309)/pCP20      |
| LIN39                     | MM33( <i>attλ</i> TB309) <i>ponB(Q411R)</i>                                                              | cefsulodin resistant isolate       |
| LIN65                     | MM33( <i>attλ</i> TB309) <i>ponB(I202F)</i>                                                              | cefsulodin resistant isolate       |
| LIN222                    | MM33( <i>attλ</i> TB309) <i>ponB(E313D)</i>                                                              | cefsulodin resistant isolate       |
| LIN425                    | MM33( <i>attλ</i> TB309) <i>ponB(Q447K)</i>                                                              | cefsulodin resistant isolate       |
| MM36( <i>attλ</i> TB309)  | MM33( <i>attλ</i> TB309) <i>ponB(Q411R) yadC::Tn10</i>                                                   | P1(CAG12025) x LIN39               |
| MM37( <i>attλ</i> TB309)  | MM33( <i>attλ</i> TB309) <i>ponB(I202F) yadC::Tn10</i>                                                   | P1(CAG12025) x LIN65               |
| MM38( <i>attλ</i> TB309)  | MM33( <i>attλ</i> TB309) <i>ponB(E313D) yadC::Tn10</i>                                                   | P1(CAG12025) x LIN222              |
| MM84( <i>attλ</i> TB309)  | MM33( <i>attλ</i> TB309) <i>ponB(Q447K) yadC::Tn10</i>                                                   | P1(CAG12025) x LIN425              |
| MM41                      | MG1655 <i>ponB(Q411R) yadC::Tn10</i>                                                                     | P1[MM36( <i>attλ</i> TB309)] x CB2 |
| MM42                      | MG1655 <i>ponB(I202F) yadC::Tn10</i>                                                                     | P1[MM37( <i>attλ</i> TB309)] x CB2 |
| MM43                      | MG1655 <i>ponB(E313D) yadC::Tn10</i>                                                                     | P1[MM38( <i>attλ</i> TB309)] x CB2 |

| Strain                    | Genotype <sup>a</sup>                                                                                                                                                          | Source/Reference <sup>b</sup>                              |
|---------------------------|--------------------------------------------------------------------------------------------------------------------------------------------------------------------------------|------------------------------------------------------------|
| MM87                      | MG1655 <i>ponB</i> (Q447K) <i>yadC</i> ::Tn10                                                                                                                                  | P1[MM86( <i>attλ</i> TB309)] x CB2                         |
| MM44                      | MG1655 <i>ponB</i> (Q411R) $\Delta$ <i>lpoB</i> ::Kan <sup>R</sup> <i>yadC</i> ::Tn10                                                                                          | P1(JW5157) x MM41                                          |
| MM45                      | MG1655 <i>ponB</i> (I202F) $\Delta$ <i>lpoB</i> ::Kan <sup>R</sup> <i>yadC</i> ::Tn10                                                                                          | P1(JW5157) x MM42                                          |
| MM46                      | MG1655 <i>ponB</i> (E313D) $\Delta$ <i>lpoB</i> ::Kan <sup>R</sup> <i>yadC</i> ::Tn10                                                                                          | P1(JW5157) x MM43                                          |
| MM118                     | MG1655 <i>ponB</i> (Q447K) $\Delta$ <i>lpoB</i> ::Kan <sup>R</sup> <i>yadC</i> ::Tn10                                                                                          | P1(JW5157) x MM87                                          |
| MM47                      | MG1655 <i>ponB</i> (Q411R) $\Delta$ <i>lpoB</i> :: <i>frt</i> <i>yadC</i> ::Tn10                                                                                               | MM44/pCP20                                                 |
| MM48                      | MG1655 <i>ponB</i> (I202F) $\Delta$ <i>lpoB</i> :: <i>frt</i> <i>yadC</i> ::Tn10                                                                                               | MM45/pCP20                                                 |
| MM49                      | MG1655 <i>ponB</i> (E313D) $\Delta$ <i>lpoB</i> :: <i>frt</i> <i>yadC</i> ::Tn10                                                                                               | MM46/pCP20                                                 |
| MM121                     | MG1655 <i>ponB</i> (Q447K) $\Delta$ <i>lpoB</i> :: <i>frt</i> <i>yadC</i> ::Tn10                                                                                               | MM118/pCP20                                                |
| MM51                      | MG1655 $\Delta$ <i>lpoB</i> :: <i>frt</i>                                                                                                                                      | CB7/pCP20                                                  |
| MM66                      | MG1655 <i>ponB</i> (E313D) $\Delta$ <i>lpoB</i> :: <i>frt</i> <i>yadC</i> ::Tn10<br>$\Delta$ <i>ponA</i> ::Kan <sup>R</sup>                                                    | P1(TU182) x MM49                                           |
| MM88( <i>attλ</i> TB309)  | TB28 $\Delta$ <i>ponA</i> ( <i>mrcA</i> ):: <i>frt</i> $\Delta$ <i>lpoB</i> :: <i>frt</i> <i>ponB</i> (Q411R)<br><i>yadC</i> ::Tn10 ( <i>P</i> <sub>ara</sub> :: <i>ponA</i> ) | P1(CAG12025) x LIN39                                       |
| MM89( <i>attλ</i> TB309)  | TB28 $\Delta$ <i>ponA</i> ( <i>mrcA</i> ):: <i>frt</i> $\Delta$ <i>lpoB</i> :: <i>frt</i> <i>ponB</i> (I202F)<br><i>yadC</i> ::Tn10 ( <i>P</i> <sub>ara</sub> :: <i>ponA</i> ) | P1(CAG12025) x LIN65                                       |
| MM107                     | MG1655 <i>ponB</i> (E313D) <i>yadC</i> ::Tn10<br>$\Delta$ <i>ponA</i> ::Kan <sup>R</sup>                                                                                       | P1(TU182) x MM43                                           |
| MM108                     | MG1655 $\Delta$ <i>ponA</i> :: <i>frt</i>                                                                                                                                      | TU182/pCP20                                                |
| MM100( <i>attλ</i> TB309) | MM33( <i>attλ</i> TB309) <i>ponB</i> (Q447K) <i>yadC</i> ::Tn10                                                                                                                | P1[MM84( <i>attλ</i> TB309)] x<br>MM33( <i>attλ</i> TB309) |
| MM102( <i>attλ</i> TB309) | MM33( <i>attλ</i> TB309) <i>ponB</i> (Q411R) <i>yadC</i> ::Tn10                                                                                                                | P1[MM36( <i>attλ</i> TB309)] x<br>MM33( <i>attλ</i> TB309) |
| MM104( <i>attλ</i> TB309) | MM33( <i>attλ</i> TB309) <i>ponB</i> (I202F) <i>yadC</i> ::Tn10                                                                                                                | P1[MM37( <i>attλ</i> TB309)] x<br>MM33( <i>attλ</i> TB309) |
| MM105( <i>attλ</i> TB309) | MM33( <i>attλ</i> TB309) <i>ponB</i> (E313D) <i>yadC</i> ::Tn10                                                                                                                | P1[MM38( <i>attλ</i> TB309)] x<br>MM33( <i>attλ</i> TB309) |
| MM109( <i>att</i> HKMM92) | MG1655 $\Delta$ <i>pal</i> ::Kan <sup>R</sup> ( <i>P</i> <sub>lac</sub> :: <i>lpoB</i> )                                                                                       | P1(MG5) x<br>MG1655( <i>att</i> HKMM92)                    |
| MM115( <i>att</i> HKMM92) | MG1655 <i>ponB</i> (E313D) $\Delta$ <i>lpoB</i> :: <i>frt</i> <i>yadC</i> ::Tn10<br>$\Delta$ <i>pal</i> ::Kan <sup>R</sup> ( <i>P</i> <sub>lac</sub> :: <i>lpoB</i> )          | P1(MG5) x<br>MM49( <i>att</i> HKMM92)                      |
| MM117( <i>att</i> HKMM92) | MG1655 $\Delta$ <i>lpoB</i> :: <i>frt</i> $\Delta$ <i>pal</i> ::Kan <sup>R</sup> ( <i>P</i> <sub>lac</sub> :: <i>lpoB</i> )                                                    | P1(MG5) x<br>MM51( <i>att</i> HKMM92)                      |

| Strain                    | Genotype <sup>a</sup>                                                                                                                                                              | Source/Reference <sup>b</sup>               |
|---------------------------|------------------------------------------------------------------------------------------------------------------------------------------------------------------------------------|---------------------------------------------|
| MM119                     | MG1655 <i>ponB</i> (E313D) $\Delta$ <i>lpoB</i> :: <i>frr</i> <i>yadC</i> ::Tn10<br>$\Delta$ <i>ponA</i> :: <i>frr</i>                                                             | MM66/pCP20                                  |
| MM120                     | MG1655 <i>ponB</i> (E313D) <i>yadC</i> ::Tn10 $\Delta$ <i>ponA</i> :: <i>frr</i>                                                                                                   | MM107/pCP20                                 |
| MM127                     | MG1655 <i>yadC</i> ::Tn10                                                                                                                                                          | P1(CAG12025) x MG1655                       |
| MM131                     | MG1655 <i>ponB</i> (Q411R) <i>yadC</i> ::Tn10                                                                                                                                      | P1[MM88( <i>att</i> $\lambda$ TB309)] x CB2 |
| MM133                     | MG1655 <i>ponB</i> (I202F) <i>yadC</i> ::Tn10                                                                                                                                      | P1[MM89( <i>att</i> $\lambda$ TB309)] x CB2 |
| MM135                     | MG1655 $\Delta$ <i>lpoB</i> :: <i>frr</i> <i>yadC</i> ::Tn10                                                                                                                       | P1(CAG12025) x MM51                         |
| MM139                     | MG1655 <i>ponB</i> (Q411R) $\Delta$ <i>lpoB</i> ::Kan <sup>R</sup><br><i>yadC</i> ::Tn10                                                                                           | P1(JW5157) x MM131                          |
| MM140                     | MG1655 <i>ponB</i> (I202F) $\Delta$ <i>lpoB</i> ::Kan <sup>R</sup> <i>yadC</i> ::Tn10                                                                                              | P1(JW5157) x MM133                          |
| MM141                     | MG1655 $\Delta$ <i>ponB</i> ( <i>mrcB</i> ):: <i>frr</i> <i>yadC</i> ::Tn10                                                                                                        | MM144/pCP20                                 |
| MM142                     | MG1655 <i>ponB</i> (Q411R) $\Delta$ <i>lpoB</i> :: <i>frr</i> <i>yadC</i> ::Tn10                                                                                                   | MM139/pCP20                                 |
| MM143                     | MG1655 <i>ponB</i> (I202F) $\Delta$ <i>lpoB</i> :: <i>frr</i> <i>yadC</i> ::Tn10                                                                                                   | MM140/pCP20                                 |
| MM144                     | MG1655 $\Delta$ <i>ponB</i> ( <i>mrcB</i> )::Kan <sup>R</sup> <i>yadC</i> ::Tn10                                                                                                   | P1(CAG12025) x CB2                          |
| JLB56( <i>att</i> HKMM81) | MG1655 <i>ponB</i> (E313D) $\Delta$ <i>lpoB</i> :: <i>frr</i> $\Delta$ <i>ponA</i> :: Kan <sup>R</sup><br><i>yadC</i> ::Tn10 ( <i>P</i> <sub>lac</sub> :: <i>gfp-ponB</i> (E313D)) | P1(TU182) x<br>MM49( <i>att</i> HMMM81)     |
| JLB56( <i>att</i> HKMM79) | MG1655 <i>ponB</i> (Q411R) $\Delta$ <i>lpoB</i> :: <i>frr</i> $\Delta$ <i>ponA</i> :: Kan <sup>R</sup><br><i>yadC</i> ::Tn10 ( <i>P</i> <sub>lac</sub> :: <i>gfp-ponB</i> (Q411R)) | P1(TU182) x<br>MM47( <i>att</i> HMMM79)     |

<sup>a</sup> The Kan<sup>R</sup> and Cm<sup>R</sup> cassettes are flanked by *frr* sites for removal by FLP recombinase. An *frr* scar remains following removal of the cassette using FLP expressed from pCP20.

<sup>b</sup> Strain constructions by P1 transduction are described using the shorthand: P1(donor) x recipient.

**Table S3.** Plasmids used in this study.

| <b>Plasmid</b> | <b>Genotype<sup>a</sup></b>                        | <b>ori</b> | <b>Source/Reference</b> |
|----------------|----------------------------------------------------|------------|-------------------------|
| pMM6           | <i>bla lacI P<sub>lac</sub>::gfp-ponB(WT)</i>      | R6K        | This study              |
| pMM79          | <i>bla lacI P<sub>lac</sub>::gfp-ponB(Q411R)</i>   | R6K        | This study              |
| pMM80          | <i>bla lacI P<sub>lac</sub>::gfp-ponB(I202F)</i>   | R6K        | This study              |
| pMM81          | <i>bla lacI P<sub>lac</sub>::gfp-ponB(E313D)</i>   | R6K        | This study              |
| pMM89          | <i>bla lacI P<sub>lac</sub>::gfp-ponB(Q447K)</i>   | R6K        | This study              |
| pMM82          | <i>bla lacI P<sub>T7</sub>::h-sumo-ponB(Q411R)</i> | pBR/colE1  | This study              |
| pMM83          | <i>bla lacI P<sub>T7</sub>::h-sumo-ponB(I202F)</i> | pBR/colE1  | This study              |
| pMM84          | <i>bla lacI P<sub>T7</sub>::h-sumo-ponB(E313D)</i> | pBR/colE1  | This study              |
| pMM90          | <i>bla lacI P<sub>T7</sub>::h-sumo-ponB(WT)</i>    | pBR/colE1  | This study              |
| pMM92          | <i>bla lacI P<sub>lac</sub>::lpoB</i>              | R6K        | This study              |

<sup>a</sup> A 6xHis tag for purification is indicated by the letter *h*. P<sub>lac</sub> and P<sub>T7</sub> indicate the lactose, phage T7 promoters, respectively.

## SUPPLEMENTAL METHODS AND MATERIALS

**Media, bacterial strains, and plasmids.** Cells were grown in LB (1% tryptone, 0.5% yeast extract, and 0.5% NaCl unless otherwise indicated) or minimal M9 media (7) supplemented with 0.2% Casamino Acids and 0.2% sugar (glucose or arabinose as indicated). Unless otherwise indicated, antibiotics were used at 25 (chloramphenicol; Cm), 25 (kanamycin; Kan), 12.5 (tetracycline; Tet), or 15 (ampicillin; Amp)  $\mu\text{g/ml}$ .

The bacterial strains used in this study are listed in **Table S2**. All *E. coli* strains used in the reported experiments are derivatives of MG1655 (1). Mutants containing multiple deletions were constructed by successive rounds of P1 transduction (7) and the removal of the Kan<sup>R</sup> resistance marker (Kan<sup>R</sup>) from cassettes flanked by *frt* sites using plasmid pCP20 as described previously (8). The desired chromosomal modification was confirmed using diagnostic PCR each time a Kan<sup>R</sup> cassette was transduced or cured. For strains containing multiple lesions, diagnostic PCR was used to confirm the status of each lesion.

To construct strain MM66 [*ponB*(E313D)  $\Delta$ *lpoB::frt yadC::Tn 10  $\Delta$ *ponA::Kan<sup>R</sup>*] the  $\Delta$ *ponA::Kan<sup>R</sup>* allele was transduced into strain MM49 [*ponB*(E313D)  $\Delta$ *lpoB::frt yadC::Tn 10*]. The transductions were plated on LB0N, LB 0.5% NaCl, or LB 1% NaCl at 30°C. Transductants only grew on the LB0N and LB 0.5% NaCl plates. Similar transductions were performed to generate equivalent strains with the *ponB*(I202F) or *ponB*(Q411R) mutants, but the no Kan<sup>R</sup> transductants grew on any of the LB plates.*

Plasmids used are listed in **Table S3**. Vectors with R6K origins are all derivatives of CRIM plasmids developed by Haldimann and Wanner (9). The vectors were either maintained in the

cloning strain DH5 $\alpha$ ( $\lambda$ *pir*), where they replicate as plasmids, or they were integrated into phage attachment sites (HK022 or  $\lambda$ ) by using the helper vectors pTB102 or pINT-ts, respectively, as previously described (9). Single-copy integrants were identified by using diagnostic PCR (9). Integrated vectors were transferred between strains by P1-mediated transduction. For all plasmid constructions, PCR was performed using KOD polymerase (Novagen) according to the manufacturer's instructions. Plasmid DNA was purified using either the Qiagen spin miniprep kit (Qiagen) or the Zippy miniprep kits (Zymo Research) while PCR fragments were purified using a Qiaquick PCR purification kit (Qiagen). Site-directed mutagenesis was performed using the QuikChange method (Stratagene).

For pMM79 [*attHK022 bla lacI<sup>q</sup> P<sub>lac</sub>::gfp-ponB(Q411R)*], pMM80 [*attHK022 bla lacI<sup>q</sup> P<sub>lac</sub>::gfp-ponB(I202F)*], pMM81 [*attHK022 bla lacI<sup>q</sup> P<sub>lac</sub>::gfp-ponB(E313D)*], and pMM89 [*attHK022 bla lacI<sup>q</sup> P<sub>lac</sub>::gfp-ponB(Q447K)*] the *ponB*<sup>\*</sup> genes were amplified from genomic DNA using the primers 5'-GTACGGATCCC CGCGCAAAGGTAAGGG-3' and 5'-GTCACTCGAGATGGGATGTTATTTACCGGATGG C-3'. The PCR products were then digested with BamHI and XhoI and ligated into BamHI/Sall digested pTB183 [*attHK022 bla P<sub>lac</sub>::gfp-zapA*] (10) to replace the *zapA* gene.

For pMM82 [*P<sub>T7</sub>::h-sumo-ponB(Q411R)*], pMM83 [*P<sub>T7</sub>::h-sumo-ponB(I202F)*], pMM84 [*P<sub>T7</sub>::h-sumo-ponB(E313D)*], and pMM90 [*P<sub>T7</sub>::h-sumo-ponB(WT)*], the relevant *ponB* PCR products generated as above were inserted into BamHI/Sall digested pTD54, a H-SUMO fusion vector essentially identical to pTD68 (11).



For pMM92 [*attHK022 bla lacI<sup>q</sup> P<sub>lac</sub>::lpoB*], the *lpoB*-containing XbaI-HindIII fragment from pCB25 [*bla lacI<sup>q</sup> P<sub>lac</sub>::lpoB*] (5) was used to replace the corresponding *gfp-zapA* fragment from pTB183 [*attHK022 bla P<sub>lac</sub>::gfp-zapA*] (10).

**Selection and screen for LpoB-bypass mutants.** Cells of MM33(*attλTB309*) [ $\Delta$ *lpoB*  $\Delta$ *ponA* (*P<sub>ara</sub>::ponA*)] were grown overnight in M9 minimal medium containing 0.2% arabinose at 30°C. The next morning, the cultures were subcultured 1:100 into 50 ml of the same medium and grown to saturation ( $OD_{600} = 1.0$ ) at 30°C. Serial dilutions were plated onto permissive conditions (M9 0.2% arabinose) to determine the concentration of viable cells. For the selection, 5 ml and 10 ml volumes of culture were pelleted, resuspended in 100  $\mu$ l, and plated on M9 0.2% arabinose with 0.01  $\mu$ g/ml cefsulodin. Resistant mutants arose at an average frequency of approximately  $10^{-7}$  based on two independent selections. Colonies were then patched on M9 0.2% arabinose and M9 0.2% glucose agar to identify arabinose-independent isolates, which were considered good candidates for mutants encoding PBP1b\* variants that function in the absence of LpoB (see Results section for details on the rationale). The *ponB* gene from each isolate was amplified and sequenced. All isolates harbored mutations in *ponB*. A list of the isolates and the mutations identified in the *ponB* gene are presented in **Table S1**.

**Culture and plating conditions.** Specific conditions used to monitor cell growth on solid or liquid media are provided in the relevant figure legends.

**Protein purification.** PBP1b (wild-type or variant) and Lpo proteins were purified as previously described (5).

**Ether-permeabilized cell assay.** This assay was performed as described previously in (5) with ether-treated cells prepared from cultures of the relevant strains grown to an OD<sub>600</sub> of 0.50 at 30°C.

**PGT Assay.** Glycan synthesis was assayed as described previously (5). Wild-type PBP1b or PBP1b variants (400 nM) were preincubated with or without lipoproteins (400 nM) at room temperature for 5 min. Reactions were initiated upon addition of proteins to lipid II (4 μM) and incubated at room temperature for 30 min prior to heat inactivation (90°C, 10 min). Gel electrophoresis analysis was carried out as described previously (12). Briefly, samples were dried and resuspended in sample buffer (125 mM Tris-HCl pH 6.8, 40% glycerol, 9% SDS, 0.004% bromophenol blue) before being loaded on a 20 x 20 cm gel (9% acrylamide, 1 mm thick) and separated at 30 mA until the dye front was 1.5 cm from the bottom. Gels were dried overnight and exposed to a phosphorimager screen for 1 week. Imaging was performed with a Typhoon phosphorimager (GE Healthcare).

## SUPPORTING REFERENCES

1. Guyer MS, Reed RR, Steitz JA, Low KB (1981) Identification of a sex-factor-affinity site in *E. coli* as gamma delta. *Cold Spring Harb Symp Quant Biol* 45 Pt 1:135–140.
2. Baba T, et al. (2006) Construction of *Escherichia coli* K-12 in-frame, single-gene knockout mutants: the Keio collection. *Mol Syst Biol* 2:2006.0008.
3. Singer M, et al. (1989) A collection of strains containing genetically linked alternating antibiotic resistance elements for genetic mapping of *Escherichia coli*. *Microbiol Mol Biol Rev* 53(1):1–24.
4. Bernhardt TG, de Boer PAJ (2004) Screening for synthetic lethal mutants in *Escherichia coli* and identification of EnvC (YibP) as a periplasmic septal ring factor with murein hydrolase activity. *Molecular Microbiology* 52(5):1255–1269.
5. Paradis-Bleau C, et al. (2010) Lipoprotein cofactors located in the outer membrane activate bacterial cell wall polymerases. *Cell* 143(7):1110–1120.
6. Gerding MA, Ogata Y, Pecora ND, Niki H, de Boer PAJ (2007) The trans-envelope Tol-Pal complex is part of the cell division machinery and required for proper outer-membrane invagination during cell constriction in *E. coli*. *Molecular Microbiology* 63(4):1008–1025.
7. Miller J (1972) *Experiments in Molecular Genetics* (Cold Spring Harbor Laboratory, New York).
8. Datsenko KA, Wanner BL (2000) One-step inactivation of chromosomal genes in *Escherichia coli* K-12 using PCR products. *Proc Natl Acad Sci USA* 97(12):6640–6645.

9. Haldimann A, Wanner BL (2001) Conditional-replication, integration, excision, and retrieval plasmid-host systems for gene structure-function studies of bacteria. *J Bacteriol* 183(21):6384–6393.
10. Bendezú FO, de Boer PAJ (2008) Conditional lethality, division defects, membrane involution, and endocytosis in mre and mrd shape mutants of *Escherichia coli*. *J Bacteriol* 190(5):1792–1811.
11. Uehara T, Parzych KR, Dinh T, Bernhardt TG (2010) Daughter cell separation is controlled by cytokinetic ring-activated cell wall hydrolysis. *EMBO J* 29(8):1412–1422.
12. Barrett D, et al. (2007) Analysis of glycan polymers produced by peptidoglycan glycosyltransferases. *J Biol Chem* 282(44):31964–31971.
